# Supplementary material for: Silicon application methods influence the nutrient uptake of maize plants
Source: Research Square preprint supplement (doi:10.21203/rs.3.rs-2877431/v1), 2023-05-09
Supplement: Supplementary file 1 [file d0f890c9c4637d427806f5dc.docx]

**Supplements Archives**

**Table S1.** Chemical (1) and particle (2) analyses of the soils before the implementation of the experiments.

| Soil chemistry (1) | Unit | Sandy soil | Clay soil |
| --- | --- | --- | --- |
| pH (CaCl2) |  | 4.6 | 3.9 |
| Presin | mg dm-3 | 4 | 3 |
| Organic matter | % | 0.9 | 1.3 |
| Ca ion exchanger resin | mmolc dm-3 | 2 | 2 |
| Mg ion exchanger resin | mmolc dm-3 | 1 | 1 |
| H+Al | mmolc dm-3 | 35 | 71 |
| K ion exchanger resin | mmolc dm-3 | 0.5 | 0.2 |
| Sum of bases | mmolc dm-3 | 3 | 3 |
| CEC | mmolc dm-3 | 39 | 74 |
| Base saturation | **%** | 3 | 4 |
| Al3+(KCl) | mmolc dm-3 | 8 | 12 |
| S Ca(H2PO4)2 | mg dm-3 | 3 | 7 |
| B (hot water) | mg dm-3 | 0.17 | 0.24 |
| Cu (DTPA) | mg dm-3 | 0.7 | 2.7 |
| Fe (DTPA) | mg dm-3 | 30 | 36 |
| Mn (DTPA) | mg dm-3 | 0.6 | 2.2 |
| Zn (DTPA) | mg dm-3 | 0.4 | 0.2 |
| Si (CaCl2 0.01 mol L-1) | mg kg 1 | 4 | 3 |
| Particle size (2) | Unit | Sandy soil | Clay soil |
| Clay | g kg 1 | 319 | 857 |
| Silt | 69 | 33 |
| Sand | 612 | 110 |

Methodology: Raij et al. (2001) (1) and Claessen (1997) (2)

**Table S2.** Sources of potassium silicate used in the treatments

| **Source** | **Composition** | **Aspect** | **Chemical formula** |
| --- | --- | --- | --- |
| **Potassium silicate (application in soil)** | 55.2 % SiO2 and 34.5% K2O | White powder | K2OSiO3 |
| **Potassium silicate (Spraying application)** | 26.7% SiO2 and 12.8% de K2O | Colourless and semitransparent liquid |

Source: Provided by manufacturers.

**
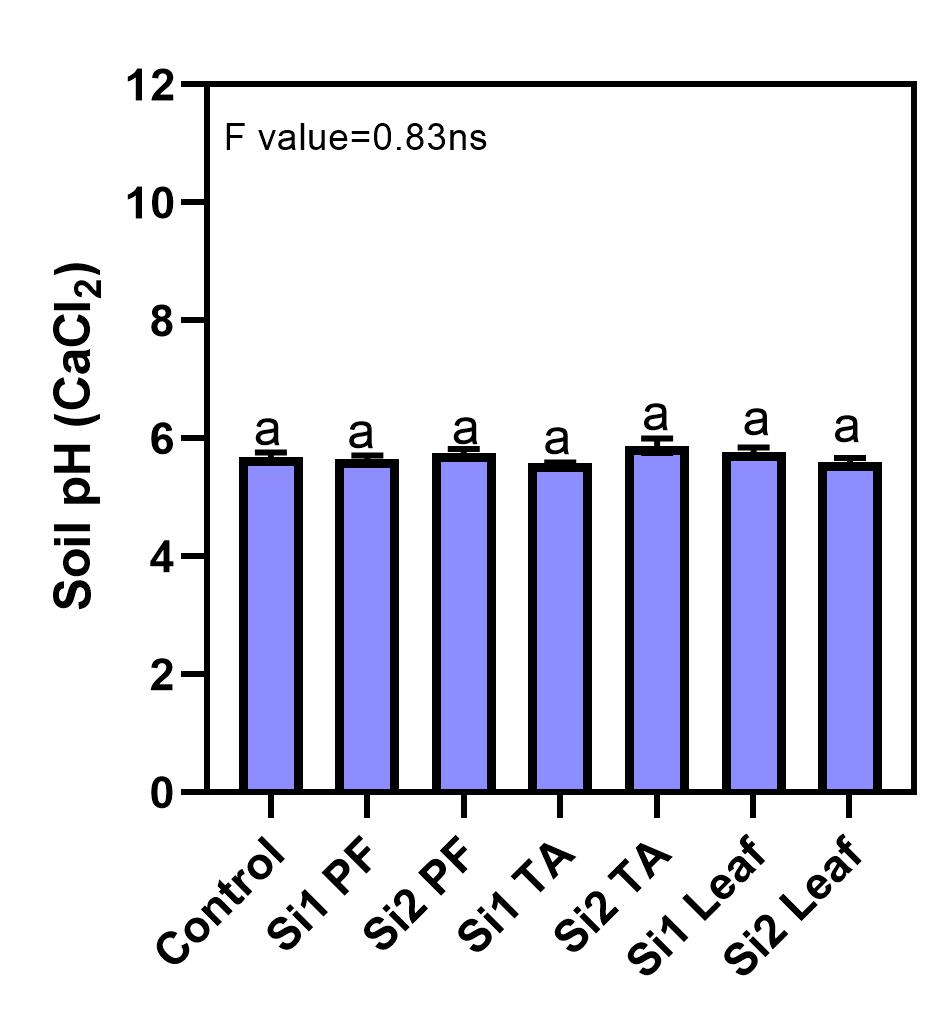
****Fig S1.** Effects of potassium silicate application methods and rates of silicon on soil pH. Experiment with sandy soil. Means followed by the same letter do not differ from each other by the Scott & Knott test. Error bars represent the standard error (n=4). Treatments abbreviations: control, no Si application; Si1 PF, 30 mg Si kg-1 in planting furrow; Si2 PF, 120 mg Si kg-1 in planting furrow; Si1 TA, 30 mg Si kg-1 in total area of pot; Si2 TA, 120 mg Si kg-1 in total area of pot; Si1 Leaf, spraying of 2.56 mg Si pot-1; and Si2 Leaf spraying of 7.68 mg Si pot-1. **= significant at 1 and 5% level. *= significant at 5% level. ns= no significant (Scott-Knott’s test).

**Fig S2.** Effects of potassium silicate application methods and rates of silicon on soil pH. Experiment with clay soil. Means followed by the same letter do not differ from each other by the Scott & Knott test. Error bars represent the standard error (n=4). Treatments abbreviations: control, no Si application; Si1 PF, 30 mg Si kg-1 in planting furrow; Si2 PF, 120 mg Si kg-1 in planting furrow; Si1 TA, 30 mg Si kg-1 in total area of pot; Si2 TA, 120 mg Si kg-1 in total area of pot; Si1 Leaf, spraying of 2.56 mg Si pot-1; and Si2 Leaf spraying of 7.68 mg Si pot-1. **= significant at 1 and 5% level. *= significant at 5% level. ns= no significant (Scott-Knott’s test).

**References**

Claessen MEC (1997) Manual de métodos de análise de solo. 2nd Edition, Embrapa CNPS, Rio de Janeiro, pp. 212

Raij BV et al. (2001) Análise Química para Avaliação da Fertilidade de Solos Tropicais. Instituto Agronômico, Campinas, pp. 285.
